# Supplementary material for: Characteristics of a Novel ATP2B3 K416_F418delinsN Mutation in a Classical Aldosterone-Producing Adenoma
Source: MDPI journal article supplement (doi:10.3390/cancers13184729), 2021-09-21
Supplement: s1 [file s1]

# Supplementary Materials: Characteristics of a Novel *ATP2B3* K416\_F418delinsN Mutation in a Classical Aldosterone-Producing Adenoma

Hung-Wei Liao, Kang-Yung Peng, Vin-Cent Wu, Yen-Hung Lin, Shuei-Liong Lin, Wei-Chou Lin and Jeff S. Chueh, on behalf of (TAIPAI) Study Group

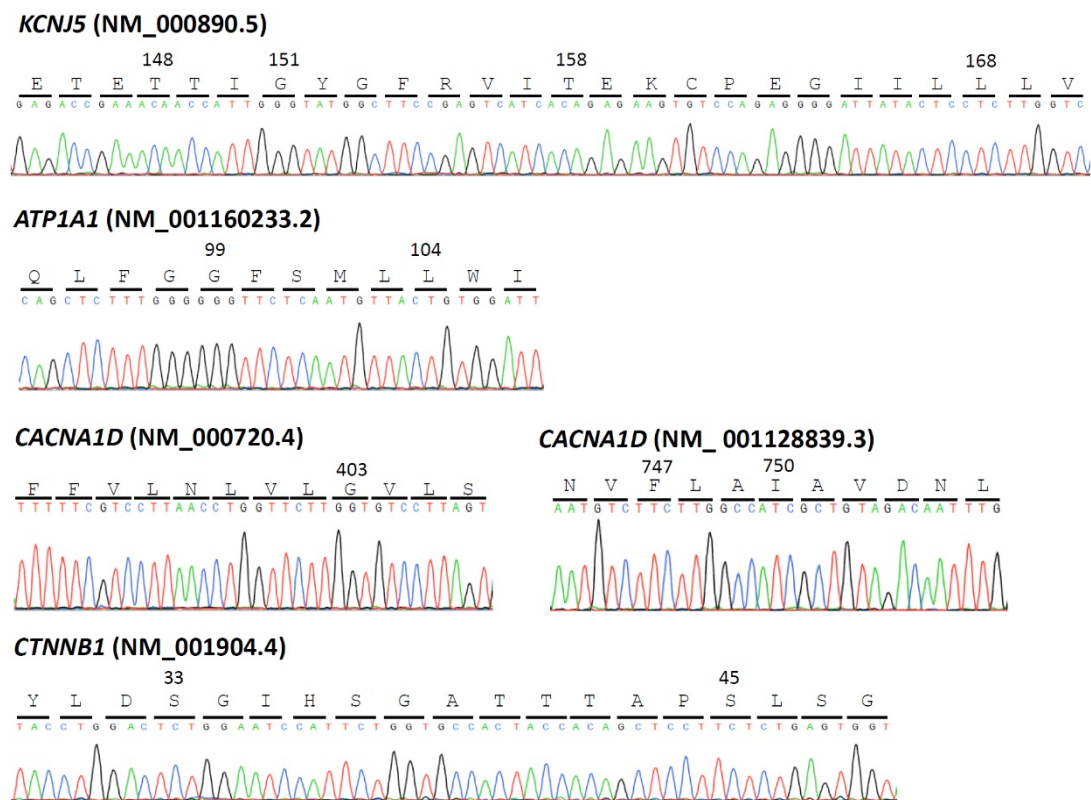

**Figure S1.** Sanger sequencing analysis of tumor DNAs for conventional and well-characterized aldosterone-driving gene mutations, including *KCNJ5*, *ATP1A1*, *CACNA1D*, and *CTNNB1*, in the adenoma harboring with *ATP2B3* K416\_F418delinsN mutation.

CYP11B2

Original data in this manuscript

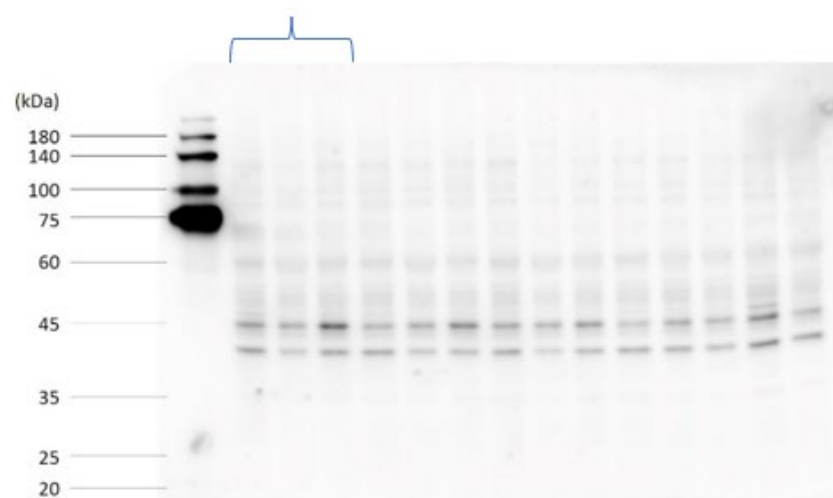

GAPDH

Original data in this manuscript

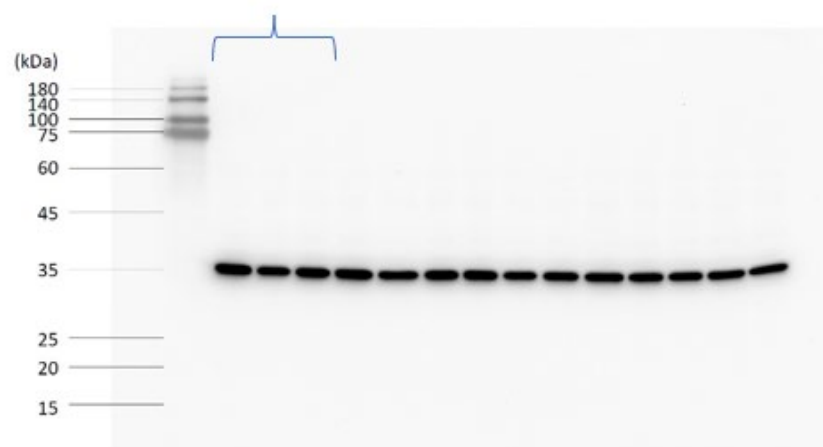

**Figure S2.** Uncropped Western Blot images from Figure 3 in the main text.

**Table S1.** Primers used for Sanger sequencing.

| <b>ATP2B3 (NM_001001344.2)</b>  |         |                            | <b>Detectable Mutations</b>              | <b>Base Pair</b> |
|---------------------------------|---------|----------------------------|------------------------------------------|------------------|
| ATP2B3-Exon 8<br>(1)            | Forward | CCTGGGCTGTTTATCCTGAA       | p.Val424_Leu425del                       | 416              |
|                                 | Reverse | CCCCAGTTTCCGAGTCTGTA       | p.Leu425_Val426del<br>p.Val426_Val427del |                  |
| <b>CACNA1D (NM_000720.4)</b>    |         |                            | <b>Detectable Mutations</b>              | <b>Base Pair</b> |
| CACNA1D-<br>Exon 8 (2)          | Forward | GCCTTGATGACTCTGTGTG        | p.Gly403Arg                              | 453              |
|                                 | Reverse | CCAGCAAAGCTTGTGTGGT        | p.Gly403Asp                              |                  |
| <b>CACNA1D (NM_001128839.3)</b> |         |                            | <b>Detectable Mutations</b>              | <b>Base Pair</b> |
| CACNA1D-<br>Exon 16 (2)         | Forward | TTTACTTCTGTAGACTGTCC TTTTA | p.Phe747Leu                              | 367              |
|                                 | Reverse | ACACGTGACTCCCACTCTCAGC     | p.Ile750Met                              |                  |
| <b>CTNNB1 (NM_001904.4)</b>     |         |                            | <b>Detectable Mutations</b>              | <b>Base Pair</b> |
| CTNNB1-Exon 3<br>(3)            | Forward | CATTCTGCTTTTCTTGGCTGTC     | p.Ser33Cys<br>p.Gly34Arg                 | 483              |
|                                 | Reverse | GCTATTACTCTCTTTTCTTCCC     | p.Ser45Phe<br>p.Ser45Pro<br>p.Ser45Cys   |                  |
| <b>ATP1A1 (NM_001160233.2)</b>  |         |                            | <b>Detectable Mutations</b>              | <b>Base Pair</b> |
| ATP1A1-Exon 4<br>(1)            | Forward | TTCCTTGGGCCTATTGTTTG       | p.Gly99 Arg                              | 487              |
|                                 | Reverse | GTGGGAGACAAAGACGGAGA       | p.Leu104Arg                              |                  |

## References

1. Wu, V.-C.; Huang, K.-H.; Peng, K.-Y.; Tsai, Y.-C.; Wu, C.-H.; Wang, S.-M.; Yang, S.-Y.; Lin, L.-Y.; Chang, C.-C.; Lin, Y.-H.; et al. Prevalence and clinical correlates of somatic mutation in aldosterone producing adenoma-Taiwanese population. *Sci. Rep.* **2015**, *5*, 11396, doi:10.1038/srep11396.
2. Fernandes-Rosa, F.L.; Williams, T.A.; Riester, A.; Steichen, O.; Beuschlein, F.; Boulkroun, S.; Strom, T.M.; Monticone, S.; Amar, L.; Meatchi, T.; et al. Genetic Spectrum and Clinical Correlates of Somatic Mutations in Aldosterone-Producing Adenoma. *Hypertension* **2014**, *64*, 354–361, doi:10.1161/hypertensionaha.114.03419.
3. Teo, A.; Garg, S.; Shaikh, L.H.; Zhou, J.; Frankl, F.E.K.; Gurnell, M.; Happerfield, L.; Marker, A.; Bienz, M.; Azizan, E.A.; et al. Pregnancy, Primary Aldosteronism, and Adrenal CTNNB1 Mutations. *New Engl. J. Med.* **2015**, *373*, 1429–1436, doi:10.1056/nejmoa1504869.
